# Supplementary material
Source: publisher figshare collection journal article supplement (https://acs.figshare.com/ndownloader/files/5435351)
Supplement: Supplementary file 1 [file 5435351]

Compound_ID	SMILES	MIC (�M)	ClogP
3	O=C(C1=CC(C(C)=CC(C)=C2)=C2N1)NC3CCCCCCC3	0.013	5.59
4	O=C(C1=CC(C(C)=CC=C2)=C2N1)NC3CCCCCC3	0.93	4.54
5	O=C(C1=CC(C(C)=CC=C2)=C2N1)NC3CCCCCCC3	0.11	5.1
6	O=C(C1=CC(C(N)=CC=C2)=C2N1)NC3CCCCCCC3	20	3.44
7	O=C(C1=CC(C=C(C)C=C2)=C2N1)NC3CCCCCC3	7.4	4.54
8	O=C(C1=CC(C=C(C)C=C2)=C2N1)NC3CCCCCCC3	0.88	5.1
9	O=C(C1=CC(C=C(N)C=C2)=C2N1)NC3CCCCCCC3	80	3.44
10	O=C(C1=CC(C=CC(C)=C2)=C2N1)NC3CCCCCCC3	0.11	5.1
11	O=C(C1=CC(C=CC(Br)=C2)=C2N1)NC3CCCCCCC3	0.09	5.56
12	O=C(C1=CC(C=CC(Br)=C2)=C2N1)NC3(C4)CC(CC4C5)C[C@@H]5C3	0.042	5.07
13	C[C@H]1[C@H](C2)C(C)(C)[C@H]2C[C@@H]1NC(C3=CC(C=CC(Br)=C4)=C4N3)=O	0.01	6.28
14	O=C(C1=CC(C=CC=C2C)=C2N1)NC3CCCCCC3	30	4.54
15	O=C(C1=CC(C=CC=C2C)=C2N1)NC3CCCCCCC3	3.5	5.1
16	O=C(C1=CC(C=C(C)C=C2C)=C2N1)NC3CCCCCC3	3.5	5.04
17	O=C(C1=CC(C=C(C)C=C2C)=C2N1)NC3CCCCCCC3	0.21	5.59
18	O=C(C1=CC(C(OC)=CC(OC)=C2)=C2N1)NC3CCCCCC3	3.2	4.01
19	O=C(C1=CC(C(OC)=CC(OC)=C2)=C2N1)NC3CCCCCCC3	0.19	4.57
20	O=C(C1=CC(C(Cl)=CC(Cl)=C2)=C2N1)NC3CCCCCCC3	0.011	6.16
21	O=C(C1=CC(C(Cl)=CC(Cl)=C2)=C2N1)NC3(C4)CC(CC4C5)C[C@@H]5C3	0.011	5.67
22	O=C(C1=CC(C(Cl)=CC(Cl)=C2)=C2N1)NC3CC4CCC3C4	0.39	5.32
23	O=C(C1=CC(C(Cl)=CC(Cl)=C2)=C2N1)NC3CC4CCC3(C)C4(C)C	0.043	6.88
24	C[C@H]1[C@H](C2)C(C)(C)[C@H]2C[C@@H]1NC(C3=CC(C(Cl)=CC(Cl)=C4)=C4N3)=O	0.021	6.88
25	C[C@@H]1[C@@H](C2)C(C)(C)[C@@H]2C[C@H]1NC(C3=CC(C(Cl)=CC(Cl)=C4)=C4N3)=O	0.086	6.88
26	C[C@H]1[C@H](C2)C(C)(C)[C@H]2C[C@@H]1NC(C3=CC(C(F)=CC(F)=C4)=C4N3)=O	0.012	5.74
27	C[C@@H]1[C@@H](C2)C(C)(C)[C@@H]2C[C@H]1NC(C3=CC(C(F)=CC(F)=C4)=C4N3)=O	0.19	5.74
28	ClC1=CC2=C(C(Cl)=C1)C=C(C(NCCCCCCC)=O)N2	>300	6.19
29	ClC1=CC2=C(C(Cl)=C1)C=C(C(NCCCCCCCC)=O)N2	>300	6.72
30	ClC1=CC2=C(C(Cl)=C1)C=C(C(NC/C=C(C)/CC/C=C(C)/C)=O)N2	11	6.75
31	FC1=CC2=C(C(F)=C1)C=C(C(NC/C=C(C)/CC/C=C(C)/C)=O)N2	>192	5.61
32	O=C(C1=CC(C(Cl)=CC(Cl)=C2)=C2N1)NCC3([H])C[C@@H]4C(C)(C)[C@H](C4)C3	175	6.98
33	O=C(C1=CC(C(Cl)=CC(Cl)=C2)=C2N1)N[C@@H](C3CCCCC3)C	5.9	5.97
34	O=C(C1=CC(C(F)=CC(F)=C2)=C2N1)N[C@@H](C3CCCCC3)C	13	4.83
35	O=C(C1=CC(C(Cl)=CC(Cl)=C2)=C2N1)NC3CC(C=CC=C4)=C4C3	0.72	5
36	O=C(C1=CC(C(F)=CC(F)=C2)=C2N1)NC3CC(C=CC=C4)=C4C3	102	3.86
37	O=C(C1=CC(C(Cl)=CC(Cl)=C2)=C2N1)NC3CCC4(CCCCC4)CC3	0.005	7.04
38	O=C(C1=CC(C(F)=CC(F)=C2)=C2N1)NC3CCC4(CCCCC4)CC3	0.003	5.9
39	O=C(C1=CC(C(Cl)=CC(Cl)=C2)=C2N1)NC3C[C@H]4N(C)[C@H](CCC4)C3	10.9	3.94
40	CC1=CC(N2)=C(C(C)=C1)C=C2CNC(C3CCCCCC3)=O	54	4.53
41	CC1=CC(N2)=C(C(C)=C1)C=C2CNC3CCCCCCC3	0.31	5.65
42	O=C(C1CCCCCC1)NC2=NC3=C(C=C(OC(F)(F)F)C=C3)S2	>300	5.99
INH	O=C(NN)c1ccncc1	0.29
